# Supplementary material for: Association between Anti-Hepatitis C Viral Intervention Therapy and Risk of Sjögren’s Syndrome: A National Retrospective Analysis
Source: MDPI journal article supplement (doi:10.3390/jcm11154259), 2022-07-22
Supplement: s1 [file s1]

**Supplementary Table S1.** The corresponding ICD-9-CM codes for the diagnoses of diseases and Anatomical Therapeutic Chemical (ATC) for drug

| Disease                                        | Corresponding ICD-9-CM codes                                                                                                                                        |
|------------------------------------------------|---------------------------------------------------------------------------------------------------------------------------------------------------------------------|
| Hepatitis C virus infection                    | 070.41, 070.44, 070.51, 070.54, V02.62                                                                                                                              |
| Human immunodeficiency virus                   | 042, 043, 044, V08, 795.8                                                                                                                                           |
| Autoimmune rheumatic diseases                  | 710.4, 710.1, 710.3, 710.4, 446.0–446.7, 136.1                                                                                                                      |
| Sjögren's syndrome                             | 710.2                                                                                                                                                               |
| Thyroid diseases                               | 240–242, 244–246                                                                                                                                                    |
| Drug                                           | ATC code                                                                                                                                                            |
| Anti-HCV therapy<br>(Interferon-based therapy) | L03AB01, L03AB02, L03AB03, L03AB04,<br>L03AB05, L03AB06, L03AB07, L03AB08,<br>L03AB09, L03AB10, L03AB11, L03AB12,<br>L03AB13, L03AB14, L03AB15, L03AB60,<br>L03AB61 |
