# Supplementary material for: Association between Anti-Hepatitis C Viral Intervention Therapy and Risk of Sjögren’s Syndrome: A National Retrospective Analysis
Source: MDPI journal article supplement (doi:10.3390/jcm11154259), 2022-07-22
Supplement: s1 [file s1]

**Supplementary Table S2.** Hazard ratios (HRs) for Sjögren's syndrome in the propensity score-matched HCV cohort

| Variable                      | Crude |             |                 | Adjusted* |             |                 |
|-------------------------------|-------|-------------|-----------------|-----------|-------------|-----------------|
|                               | HR    | 95% CI      | <i>p</i> -value | HR        | 95% CI      | <i>p</i> -value |
| HCV cohort                    |       |             |                 |           |             |                 |
| Untreated                     | 1     | Reference   |                 | 1         | Reference   |                 |
| Treated with anti-HCV therapy | 0.93  | (0.64-1.33) | 0.68            | 0.93      | (0.65-1.35) | 0.72            |
| Sex (men/women)               | 0.30  | (0.21-0.41) | <0.001          | 0.34      | (0.25-0.48) | <0.001          |
| Age (per year)                | 1.02  | (1.01-1.03) | 0.002           | 1.01      | (0.99-1.02) | 0.45            |
| Comorbidity (yes/no)          |       |             |                 |           |             |                 |
| Thyroid disease               | 2.43  | (1.68-3.51) | <0.001          | 1.61      | (1.10-2.34) | 0.013           |
| Geographic region             |       |             |                 |           |             |                 |
| Northern                      | 1     | Reference   |                 | 1         | Reference   |                 |
| Central                       | 1.74  | (1.25-2.44) | 0.001           | 2.50      | (1.69-3.70) | <0.001          |
| Eastern                       | 0.21  | (0.03-1.51) | 0.12            | 0.35      | (0.05-2.54) | 0.30            |
| Southern                      | 0.46  | (0.30-0.72) | 0.001           | 0.58      | (0.36-0.92) | 0.02            |
| Urbanization level            |       |             |                 |           |             |                 |
| Urban                         | 1     | Reference   |                 | 1         | Reference   |                 |
| Suburban                      | 0.71  | (0.49-1.01) | 0.06            | 0.65      | (0.44-0.95) | 0.03            |
| Rural                         | 0.72  | (0.49-1.06) | 0.10            | 0.48      | (0.30-0.76) | 0.002           |
| Number of medical visits      | 1.01  | (1.01-1.02) | <0.001          | 1.01      | (1.01-1.02) | <0.001          |

Abbreviations: HCV, hepatitis C virus; HR, hazard ratio; CI, confidence interval.

\*Adjusted for age per year, sex, comorbidity, geographic region, urbanization level, and number of medical visits.
